# Supplementary material for: Cognitive Changes following Bilateral Deep Brain Stimulation of Subthalamic Nucleus in Parkinson’s Disease: A Meta-Analysis
Source: Hindawi journal article supplement (doi:10.1155/2016/3596415), 2016-01-01
Supplement: f1 [file 3596415.f1.pdf]

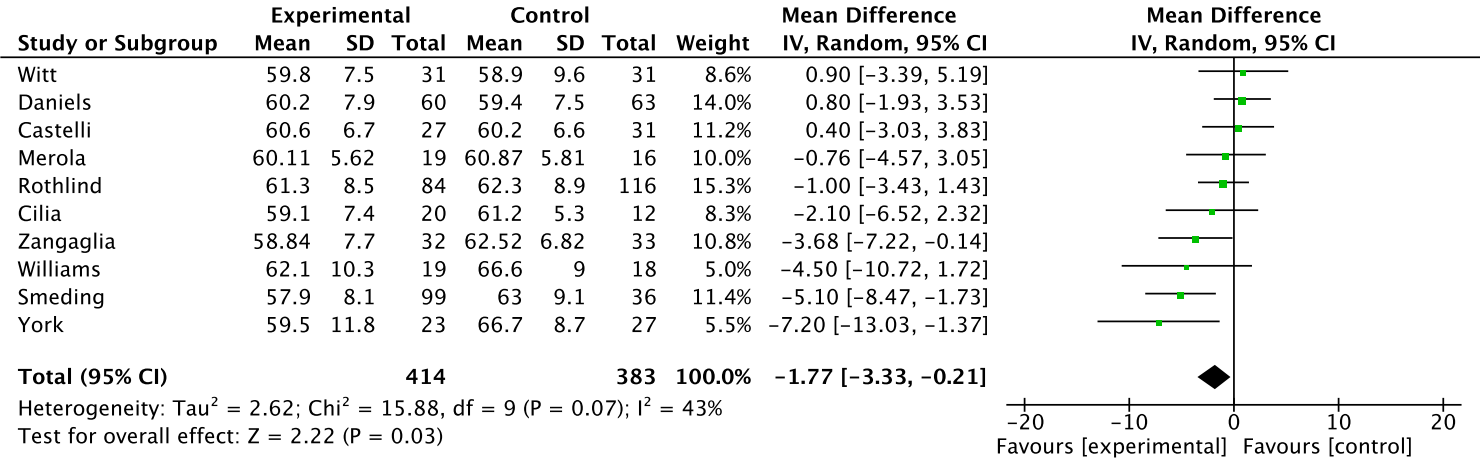

Figure S1. Meta-analysis of pretreatment age difference STN DBS vs. Control

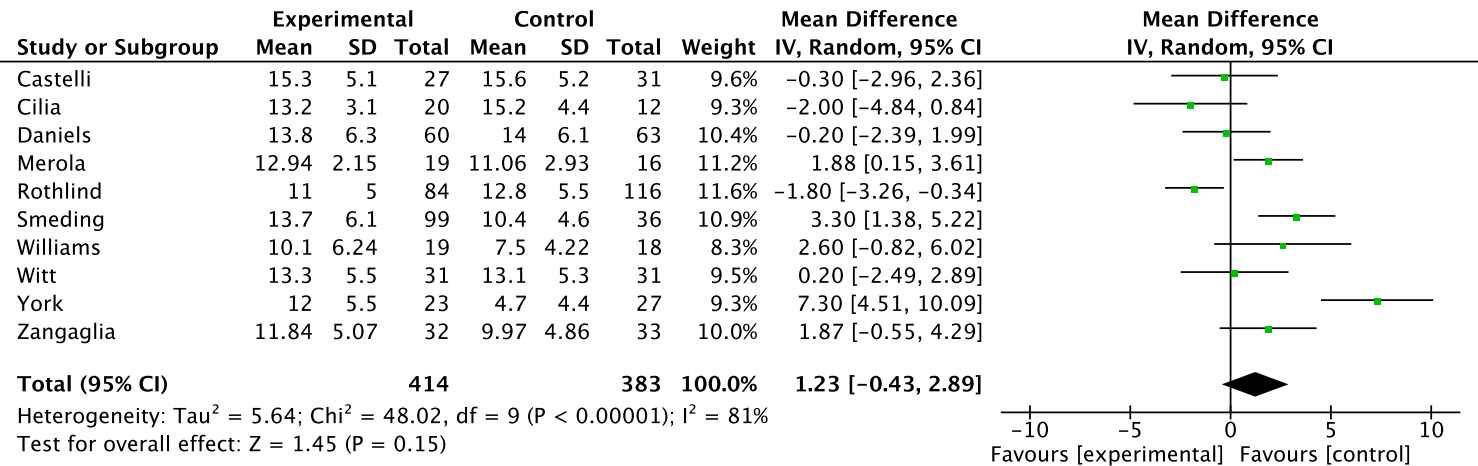

Figure S2. Meta-analysis of pretreatment duration of disease difference STN DBS vs. Control

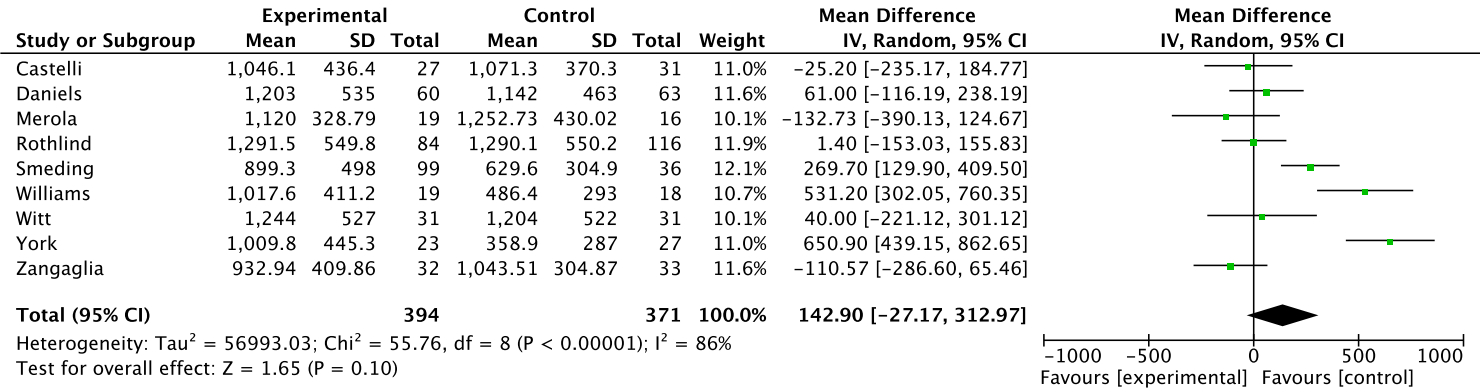

Figure S3. Meta-analysis of pretreatment LED difference STN DBS vs. Control

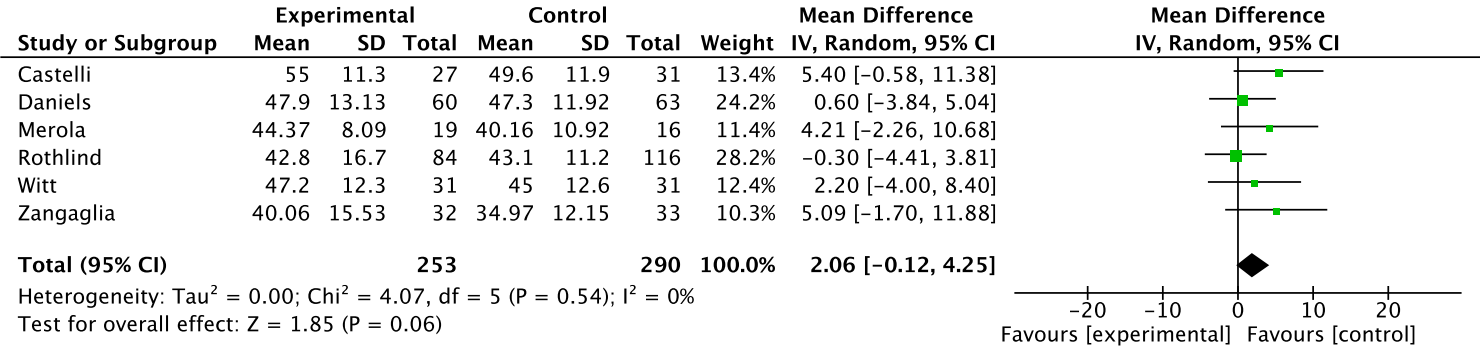

Figure S4. Meta-analysis of pretreatment UPDRS(medication-off) STN DBS vs. Control

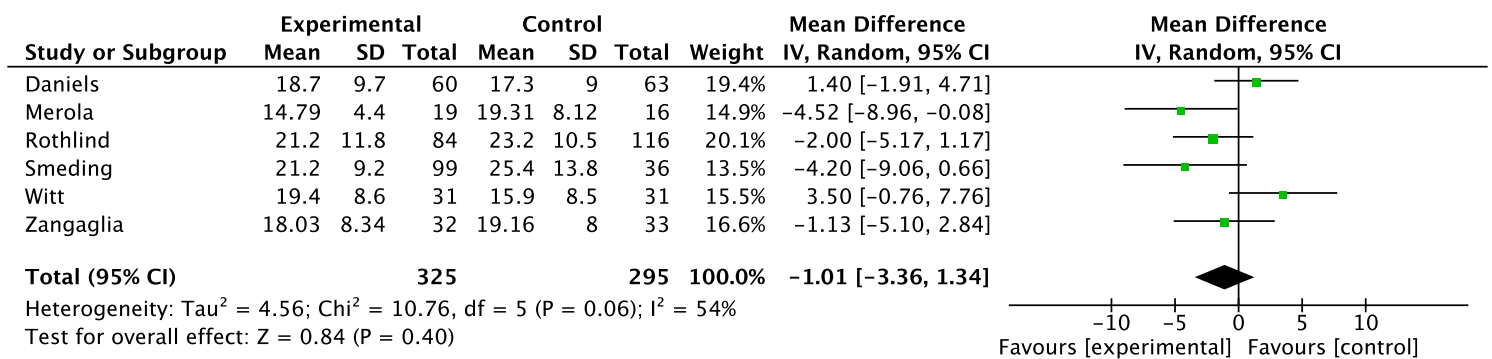

Figure S5. Meta-analysis of pretreatment UPDRS(medication-on) STN DBS vs. Control

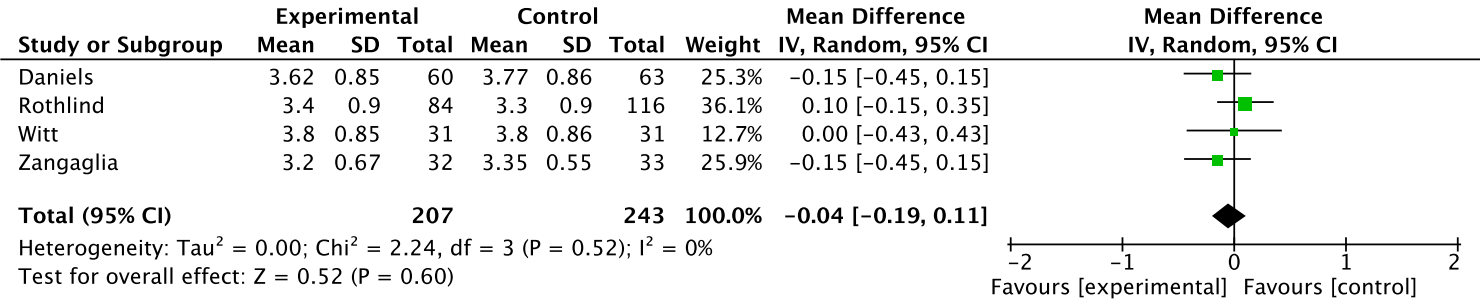

Figure S6. Meta-analysis of pretreatment Hoehn-Yahr(medication-off) STN DBS vs. Control

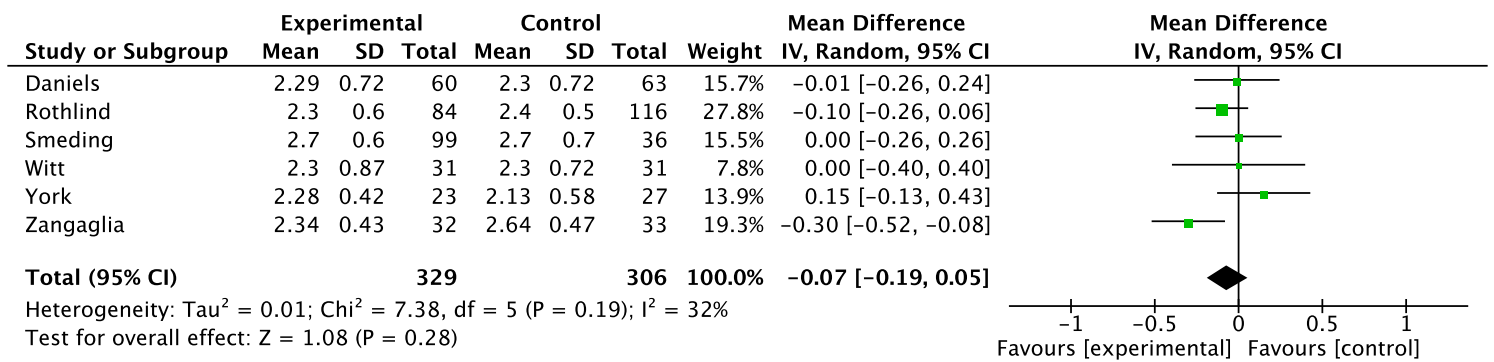

Figure S7. Meta-analysis of pretreatment Hoehn-Yahr(medication-on) STN DBS vs. Control

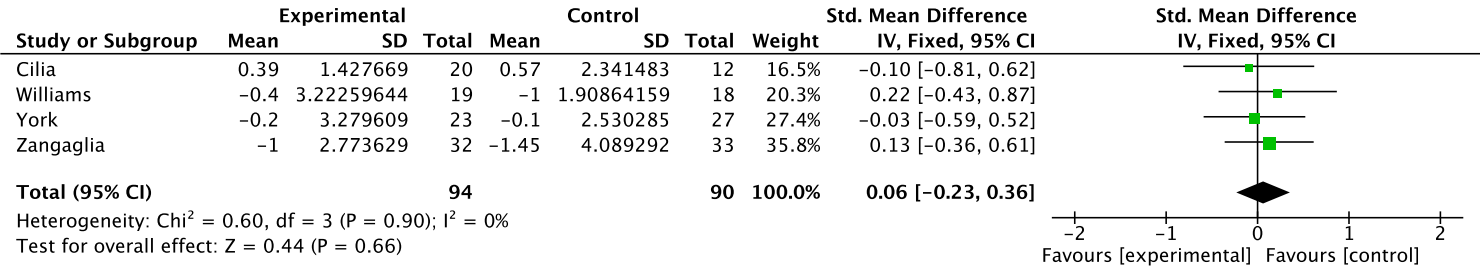

Figure S8. Forest plot of Mini Mental State Examination change STN DBS vs. Control



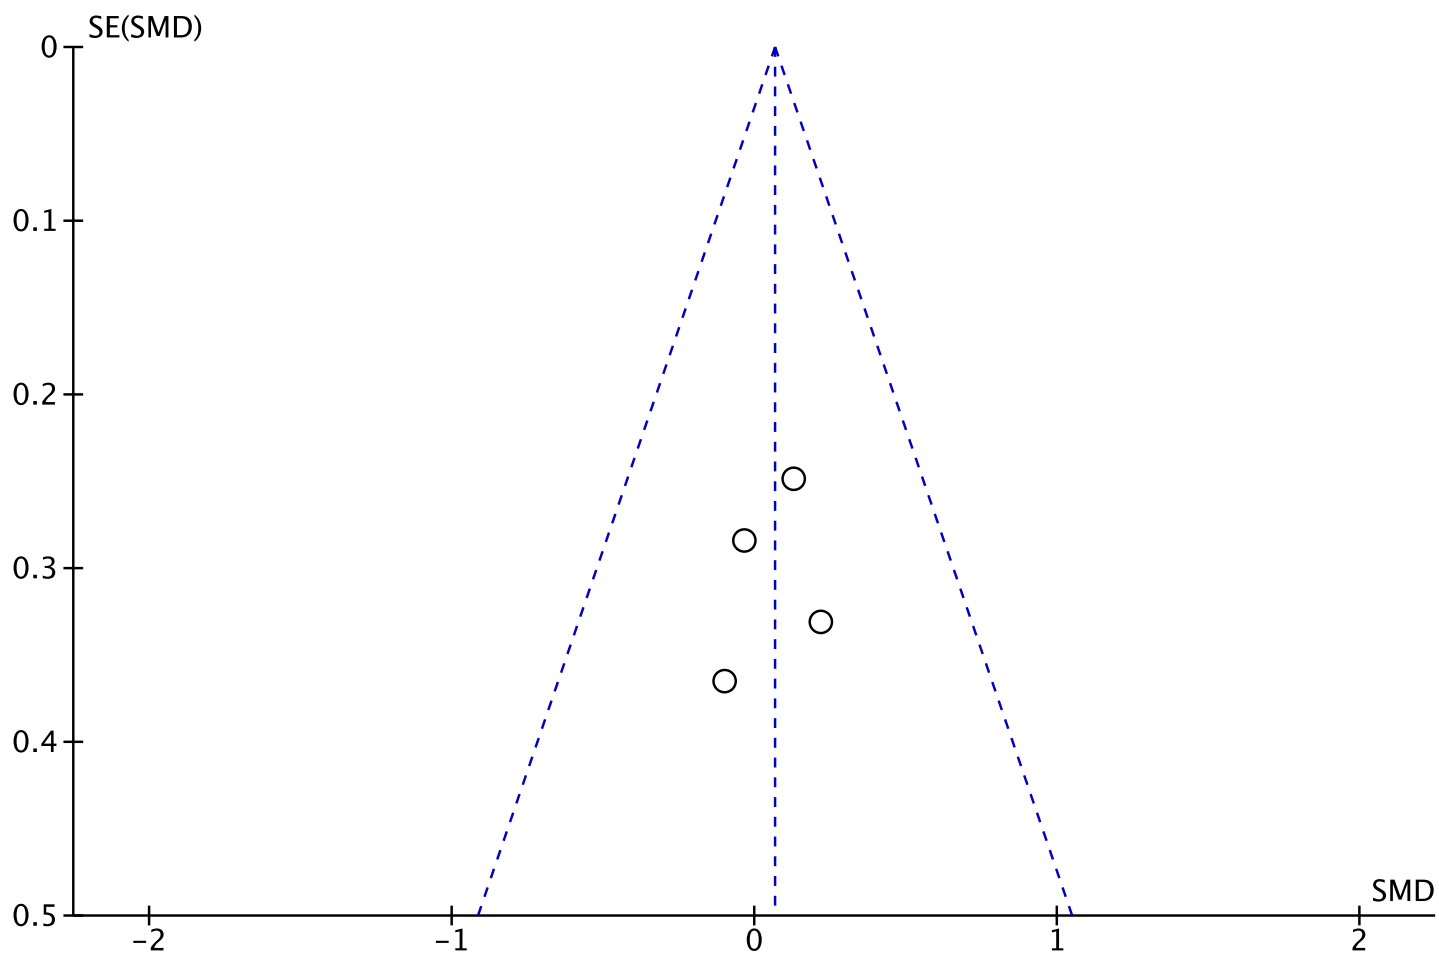

Figure S9. funnel plot of Mini Mental State Examination change STN DBS vs. Control

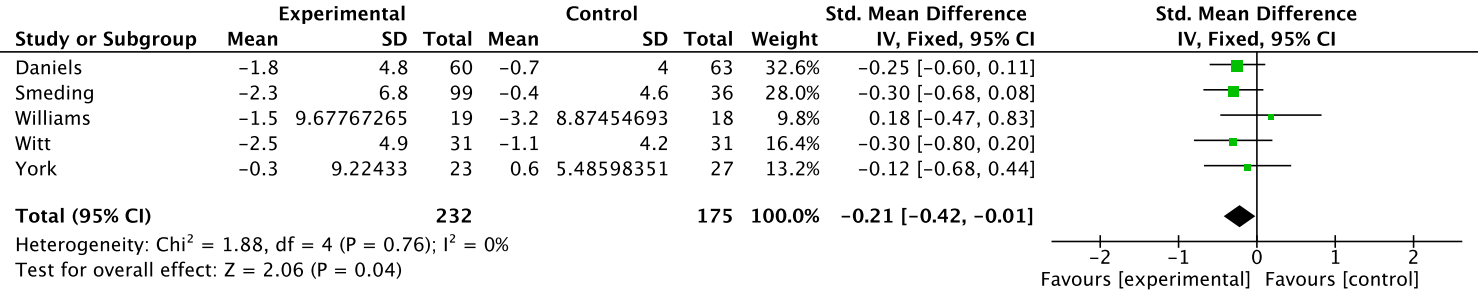

Figure S10. Forest plot of Mattis Dementia Rating Scale change STN DBS vs. Control

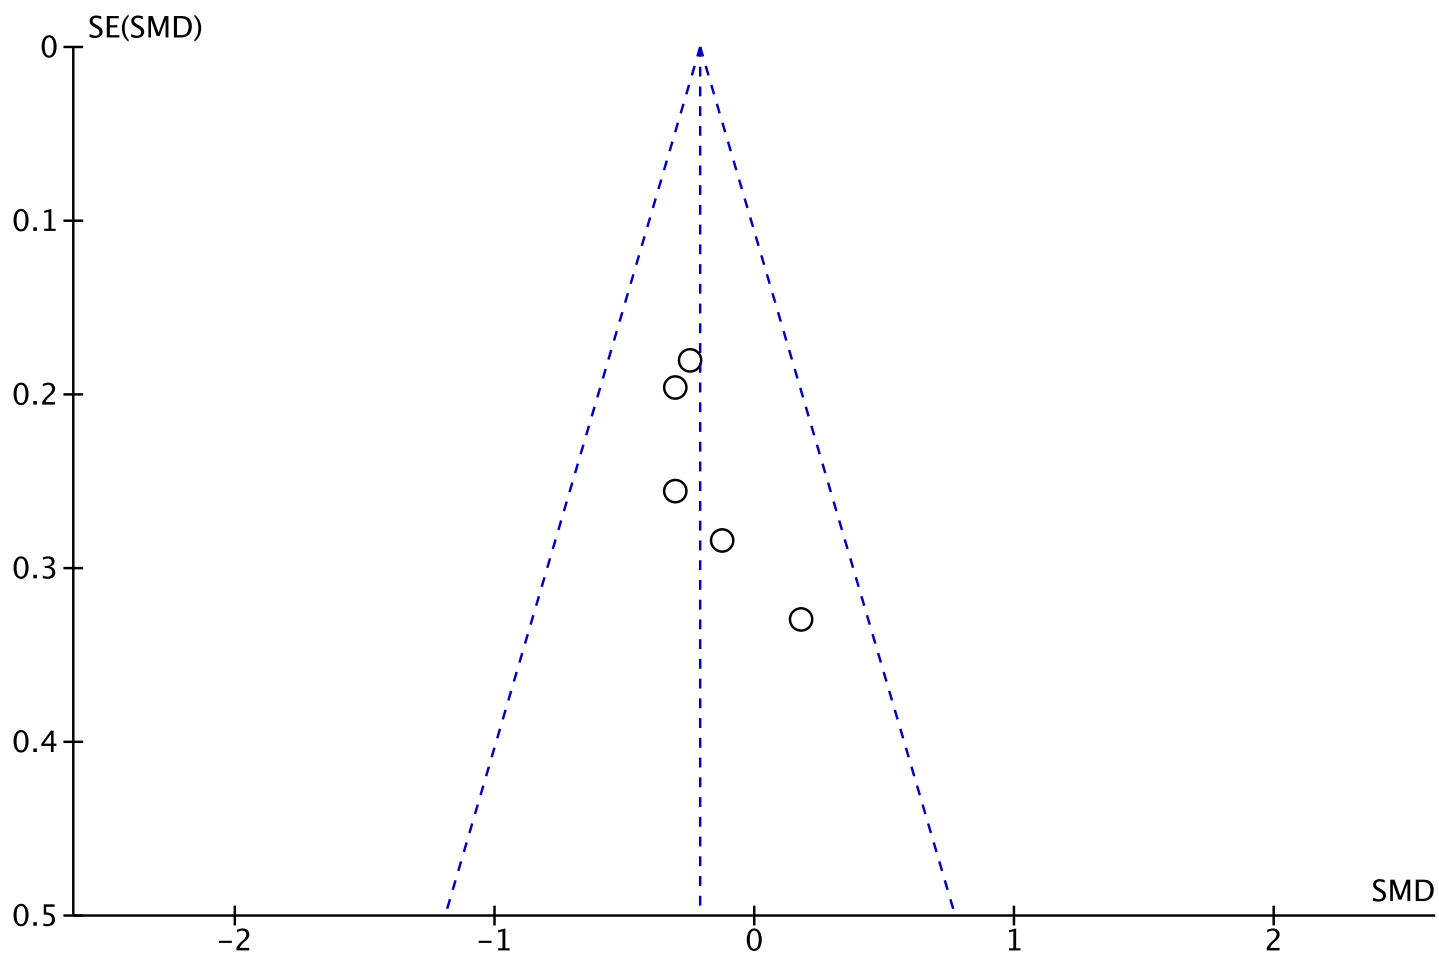

Figure S11. Funnel plot of Mattis Dementia Rating Scale change STN DBS vs. Control

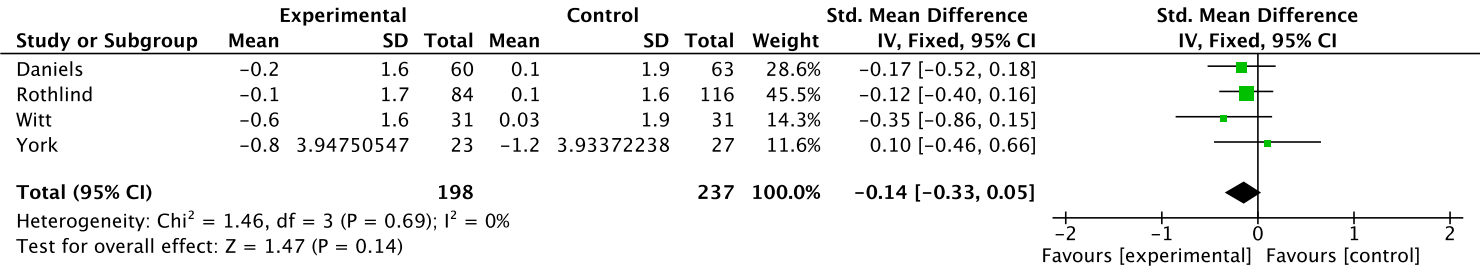

Figure S12. Forest plot of Digit span backward change STN DBS vs. Control

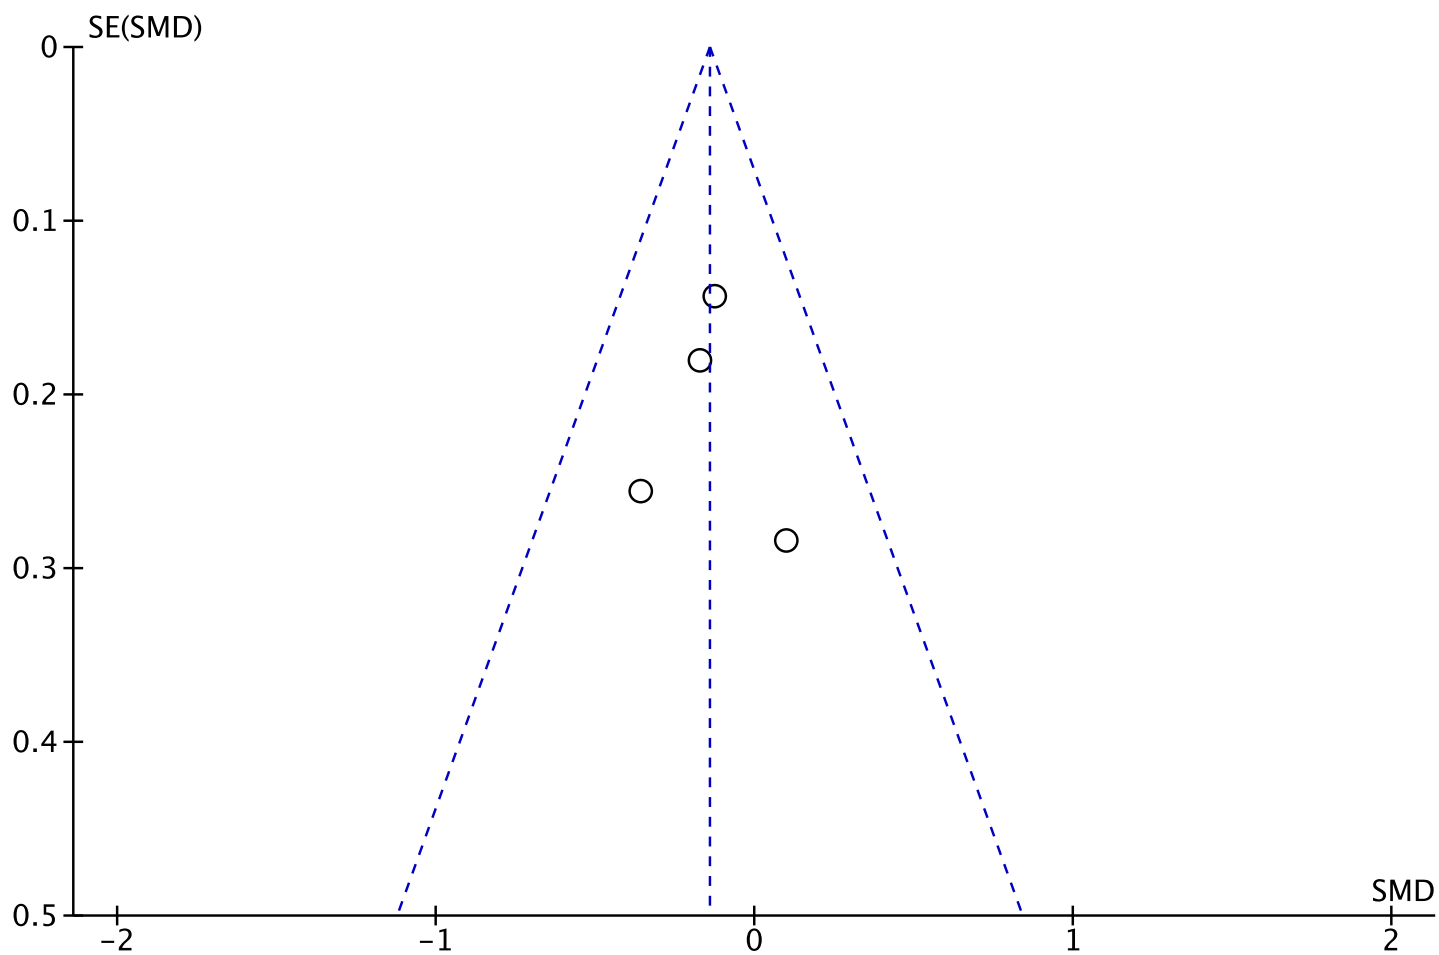

Figure S13. Funnel plot of Digit span backward change STN DBS vs. Control

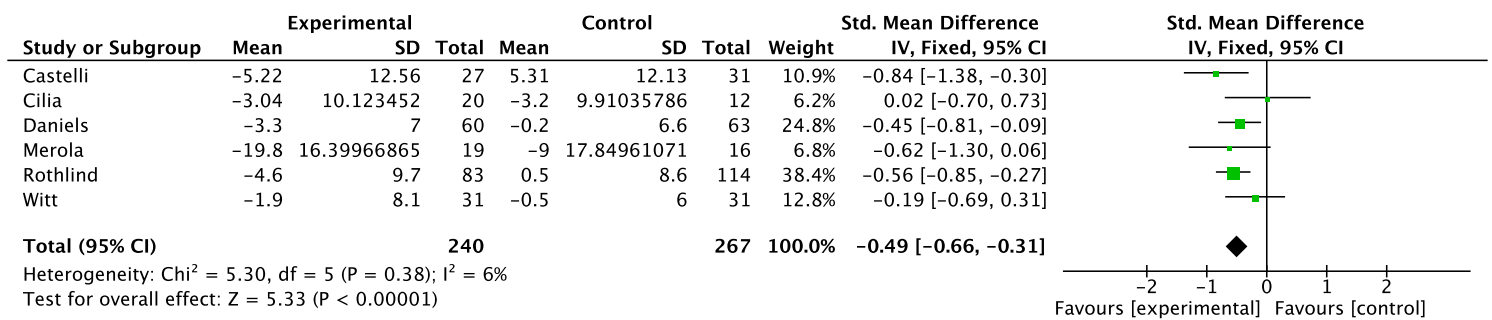

Figure S14. Forest plot of Phonemic fluency change STN DBS vs. Control

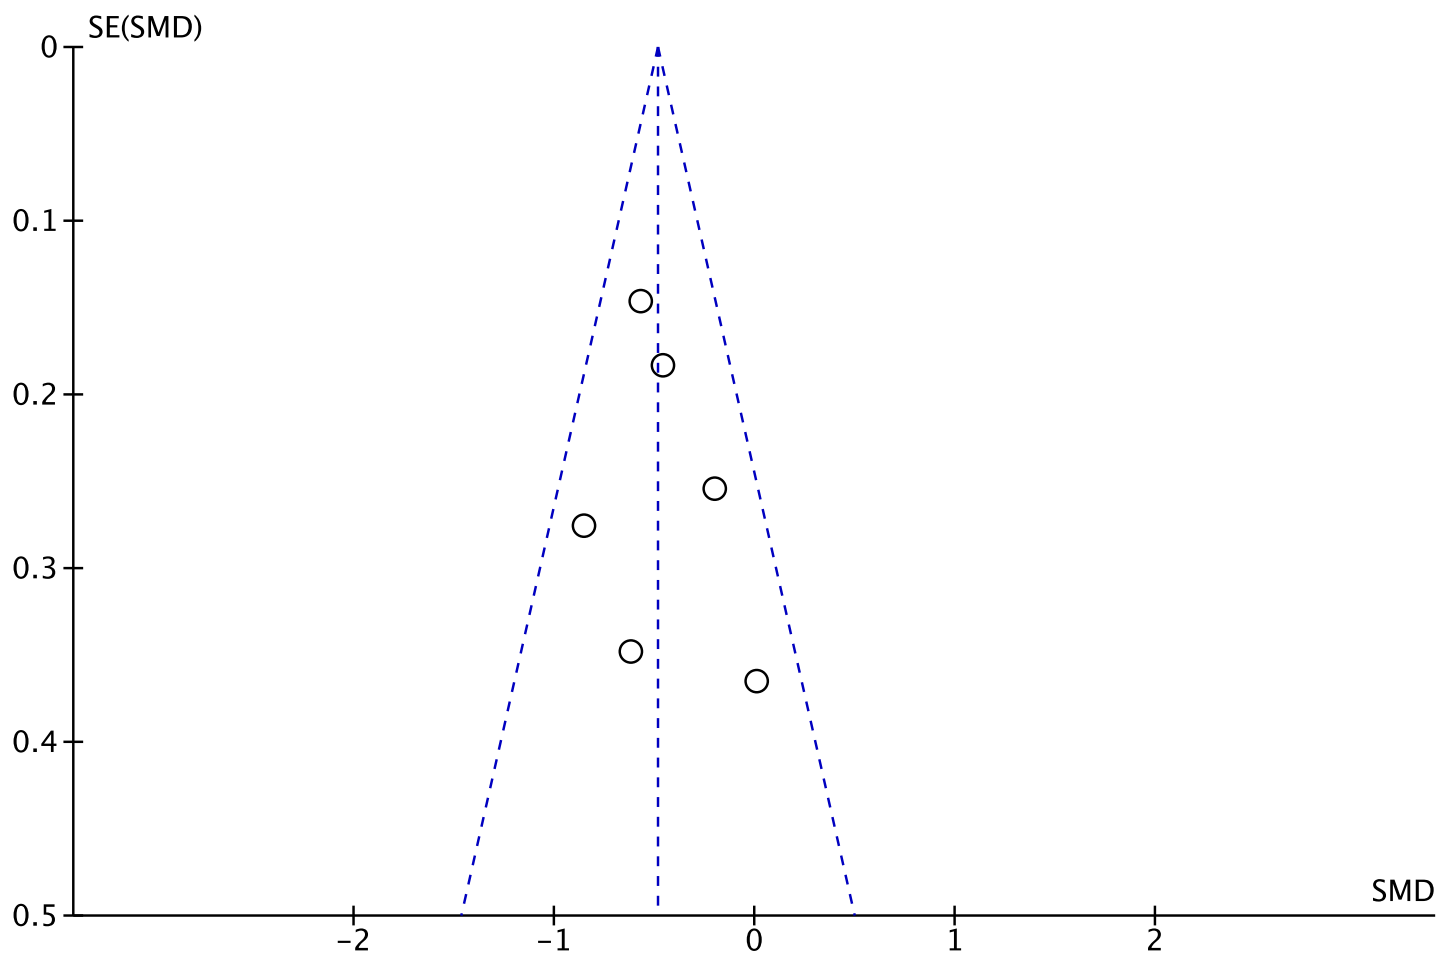

Figure S15. Funnel plot of Phonemic fluency change STN DBS vs. Control

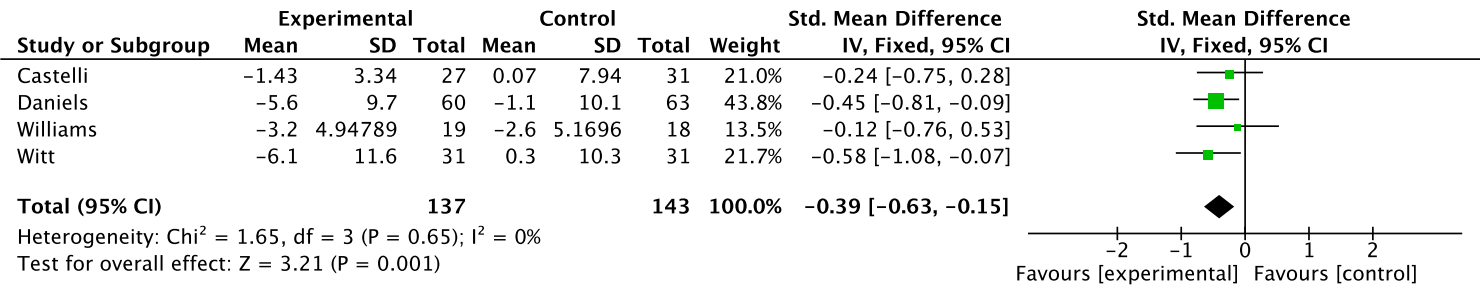

Figure S16. Forest plot of Semantic fluency change STN DBS vs. Control



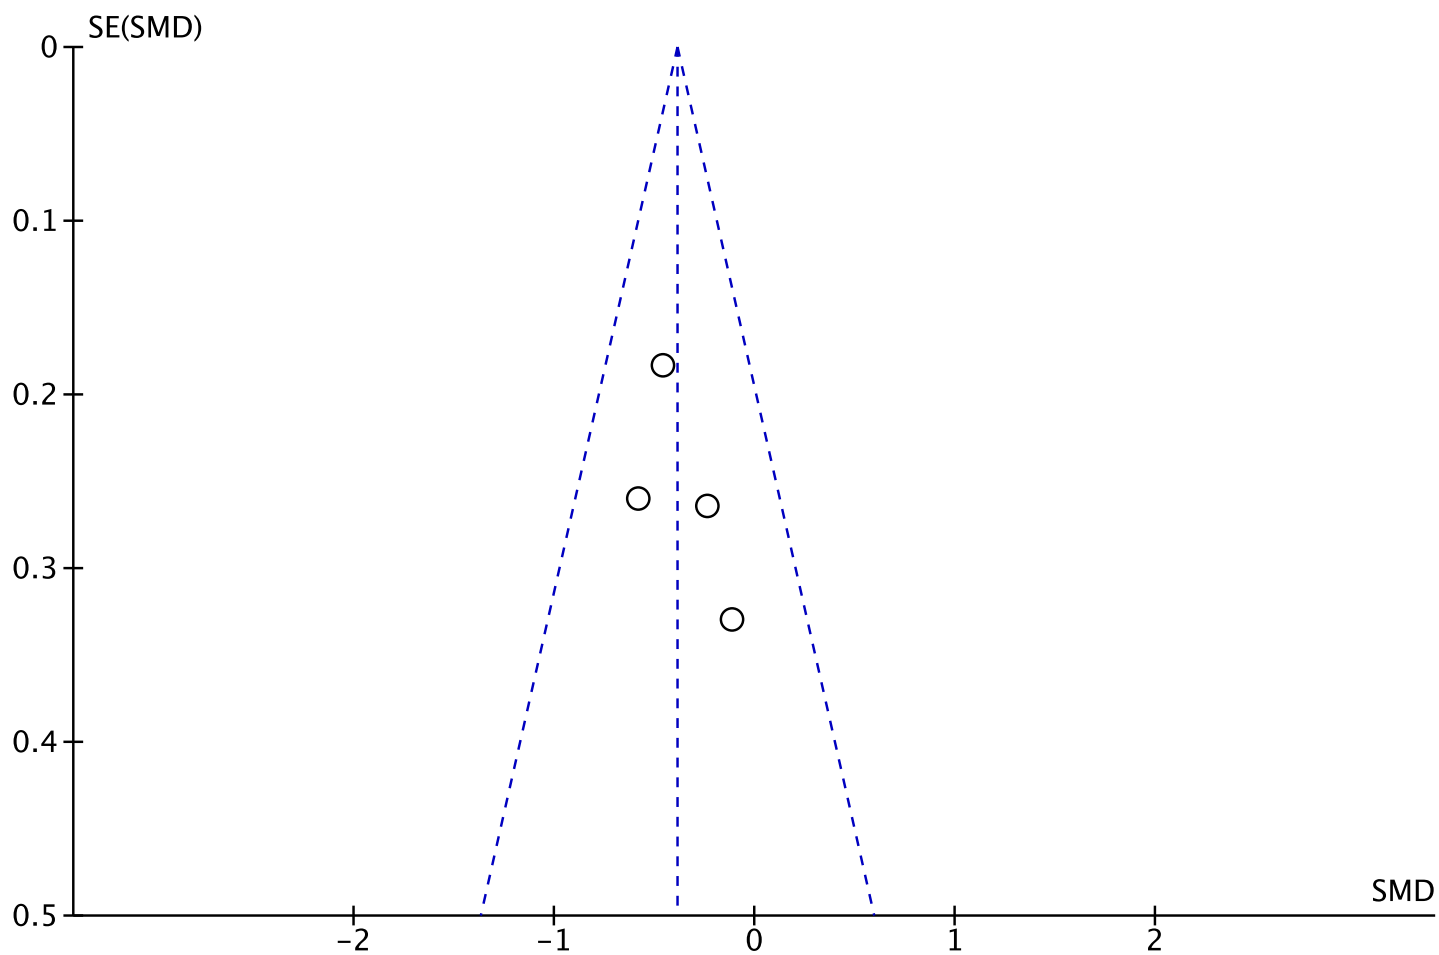

Figure S17. Funnel plot of Semantic fluency change STN DBS vs. Control

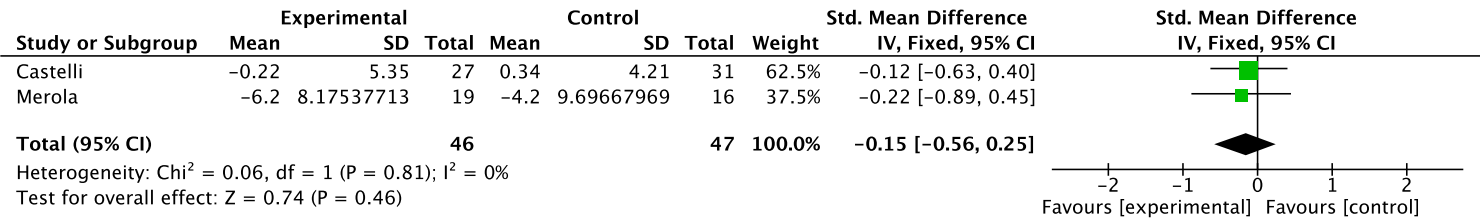

Figure S18. Forest plot of Reven Color Matrics change STN DBS vs. Control

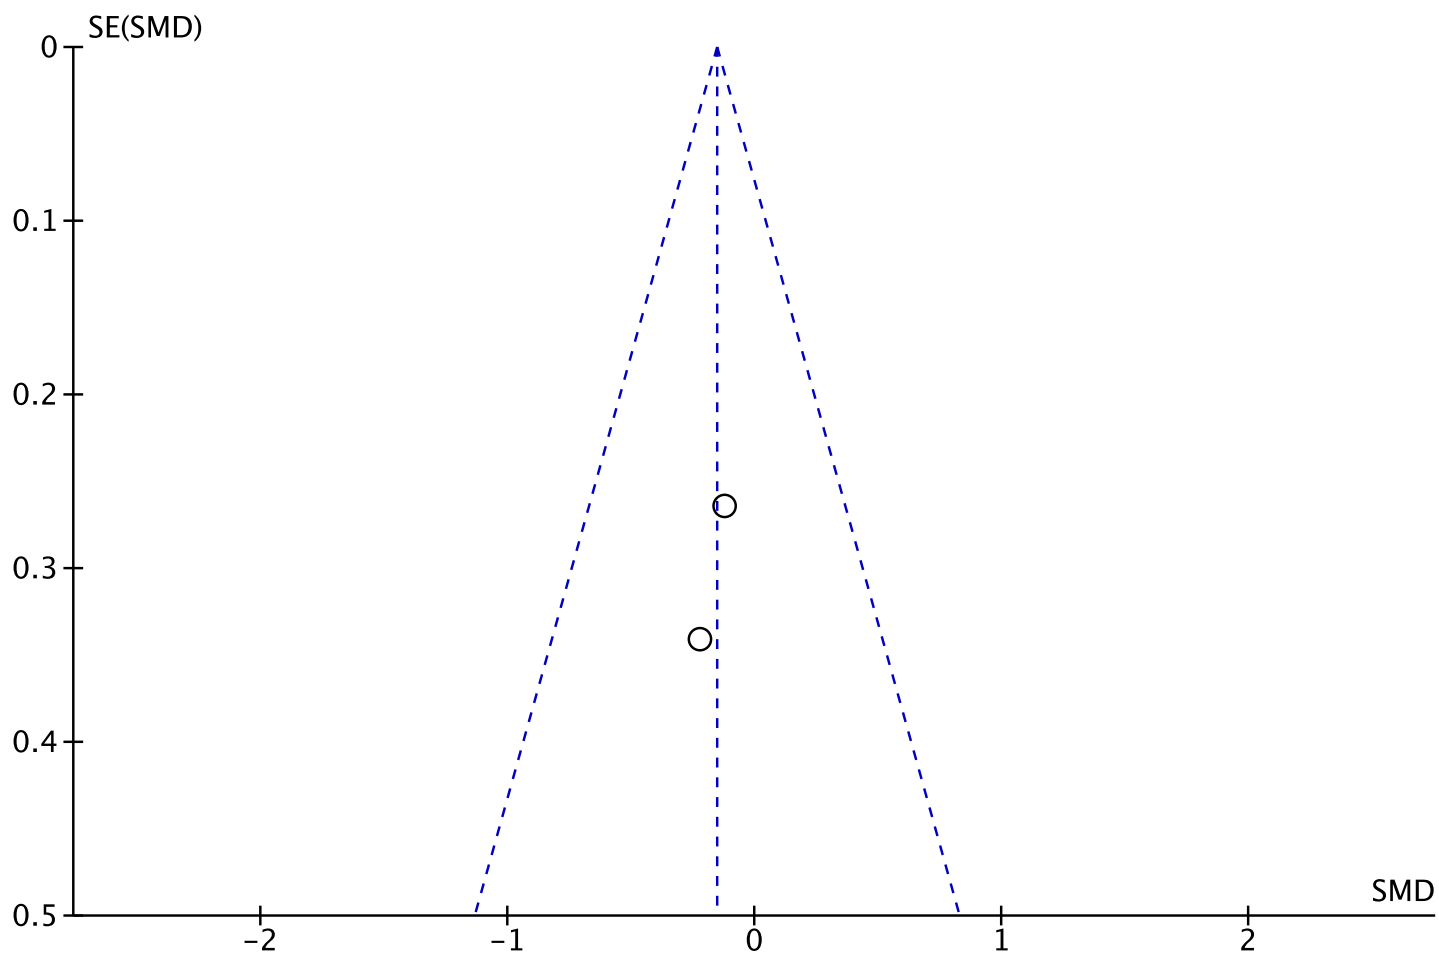

Figure S19. Funnel plot of Reven Color Matrics change STN DBS vs. Control

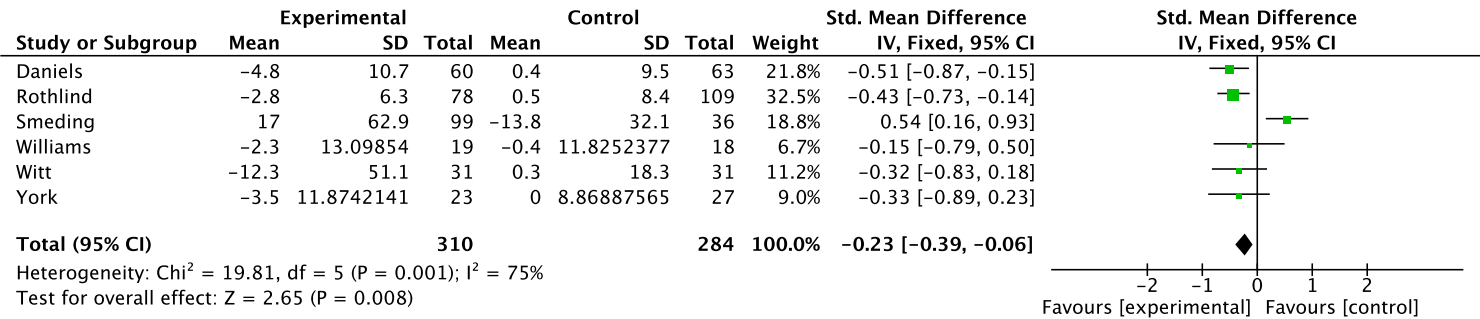

Figure S20. Forest plot of Stroop Color Word change STN DBS vs. Control

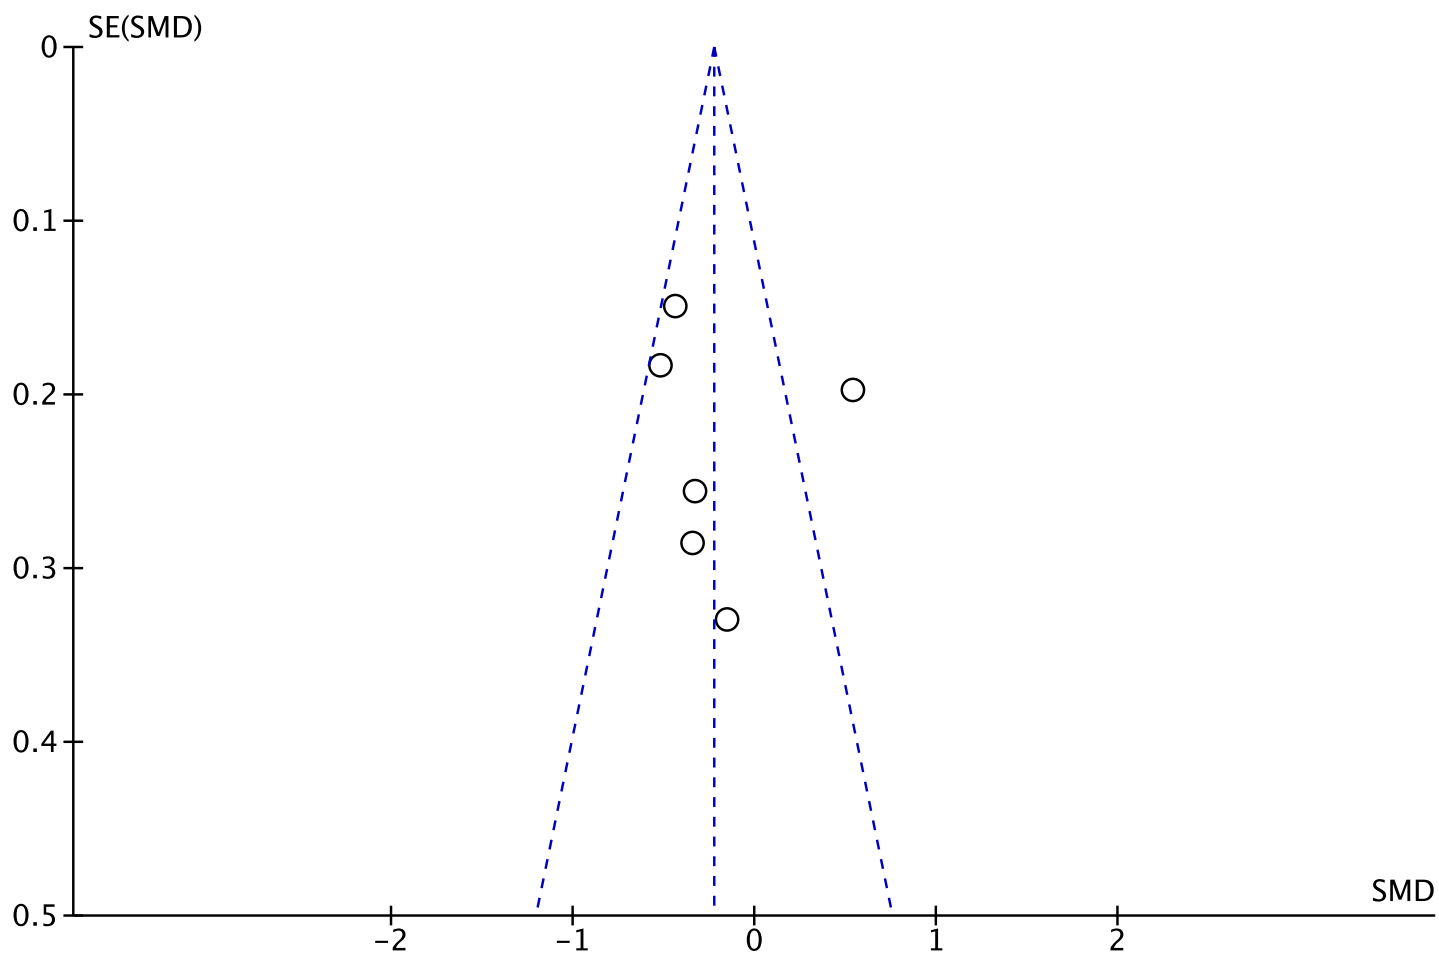

Figure S21. Funnel plot of Stroop Color Word change STN DBS vs. Control

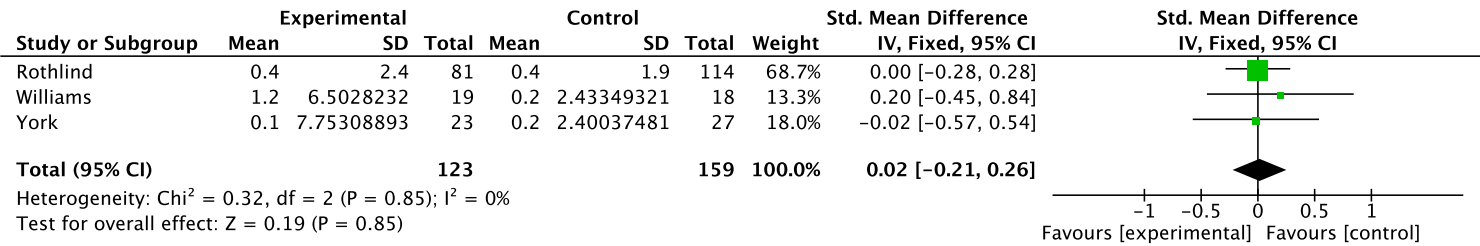

Figure S22. Forest plot of Boston Naming change STN DBS vs. Control

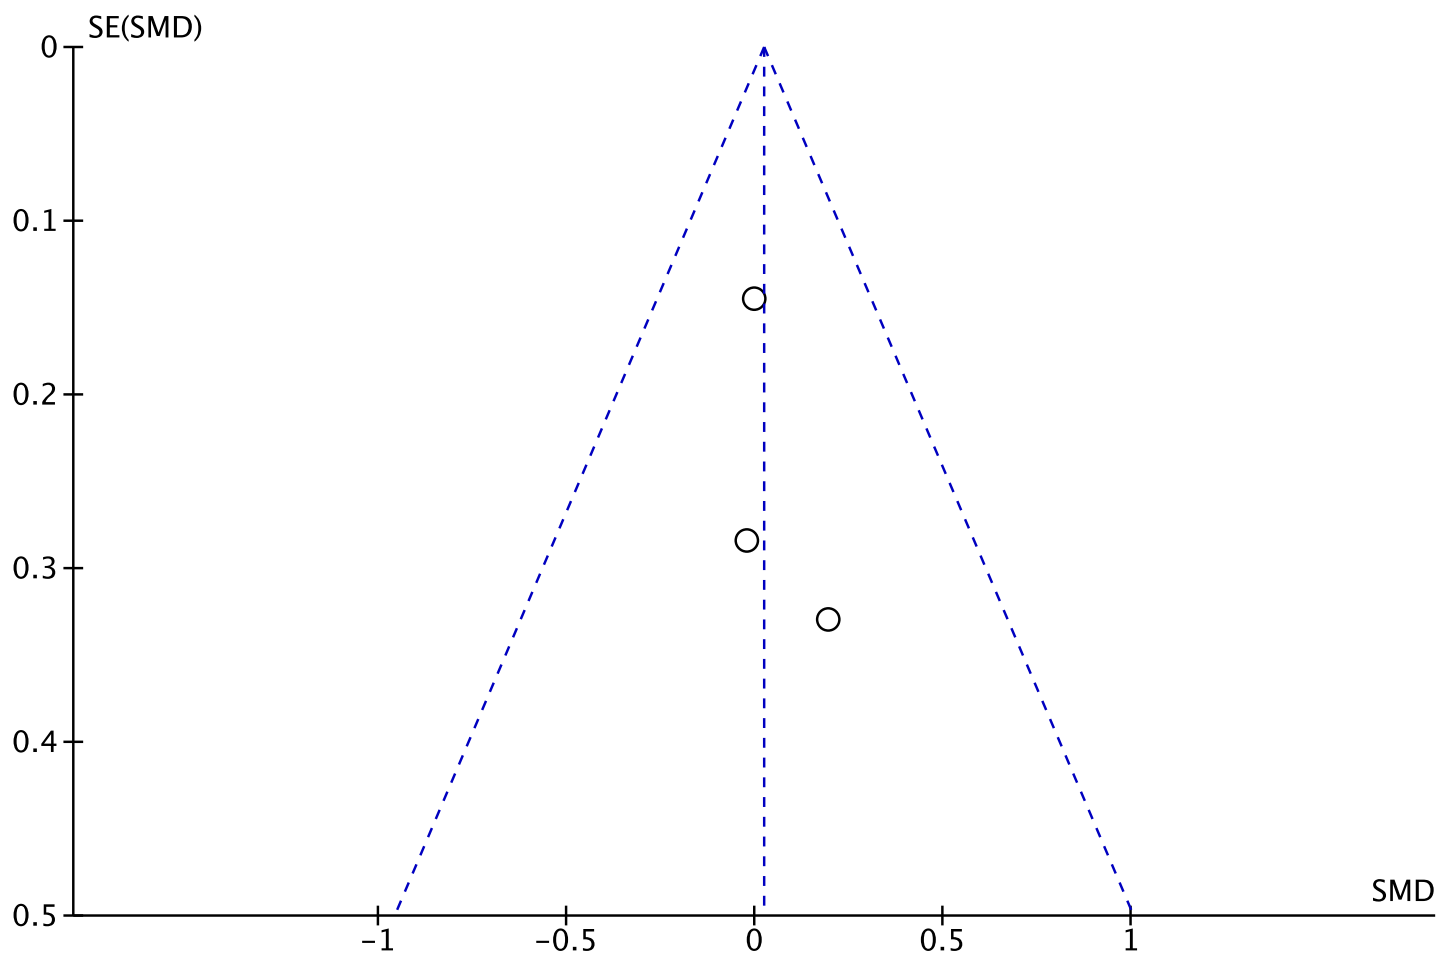

Figure S23. Funnel plot of Boston Naming change STN DBS vs. Control

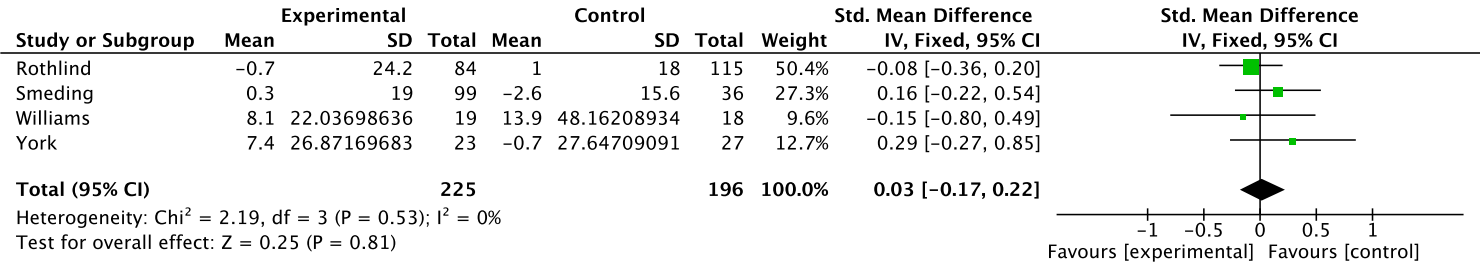

Figure S24. Forest plot of Trial Making a change STN DBS vs. Control



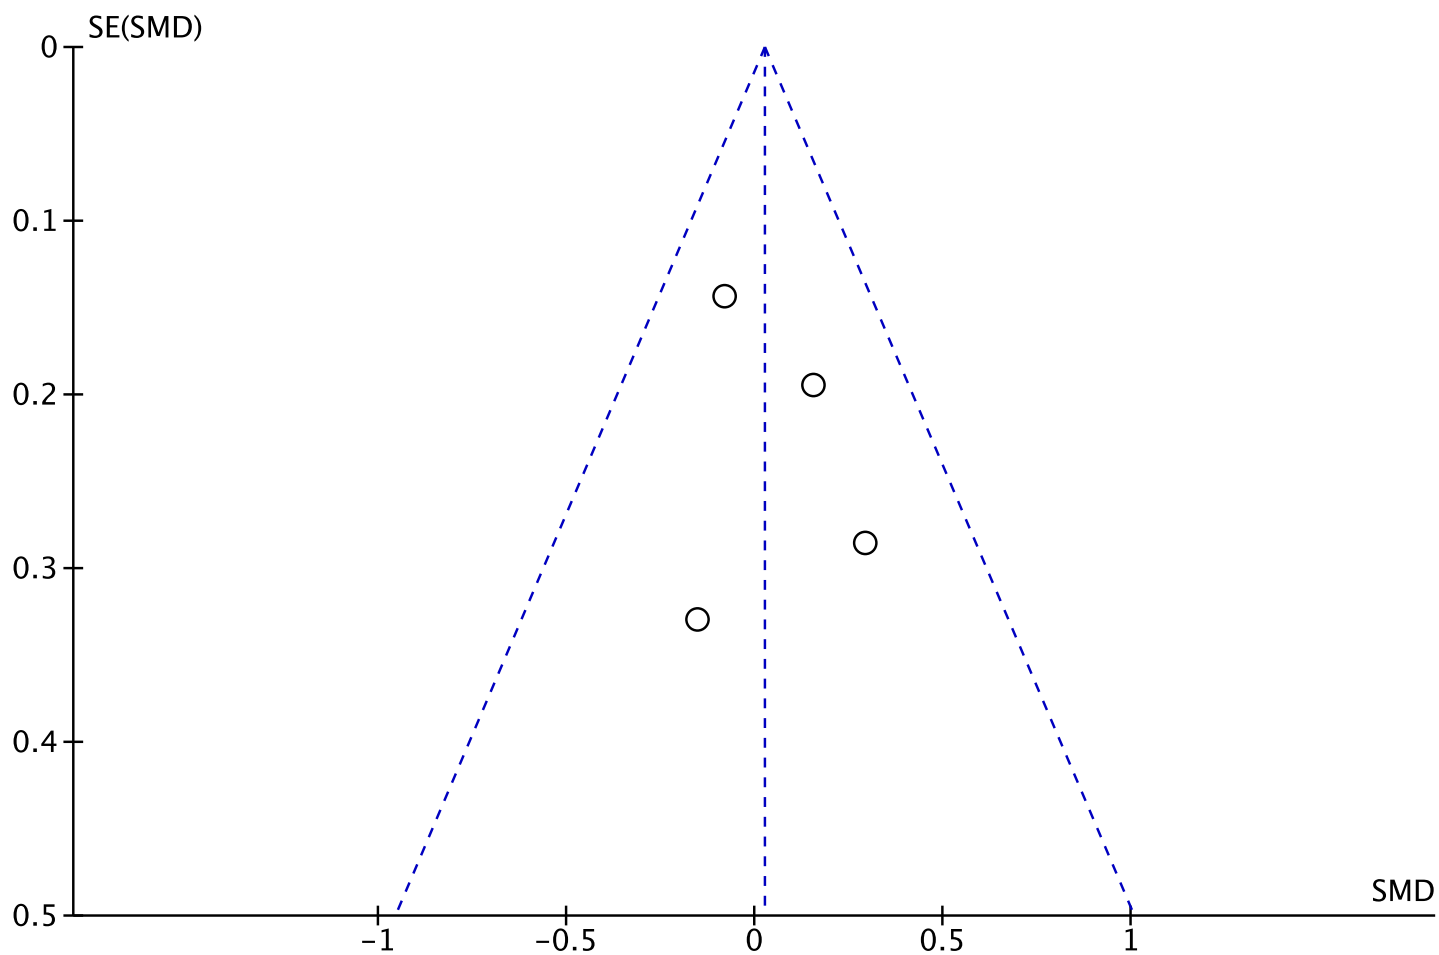

Figure S25. Funnel plot of Trial Making a change STN DBS vs. Control

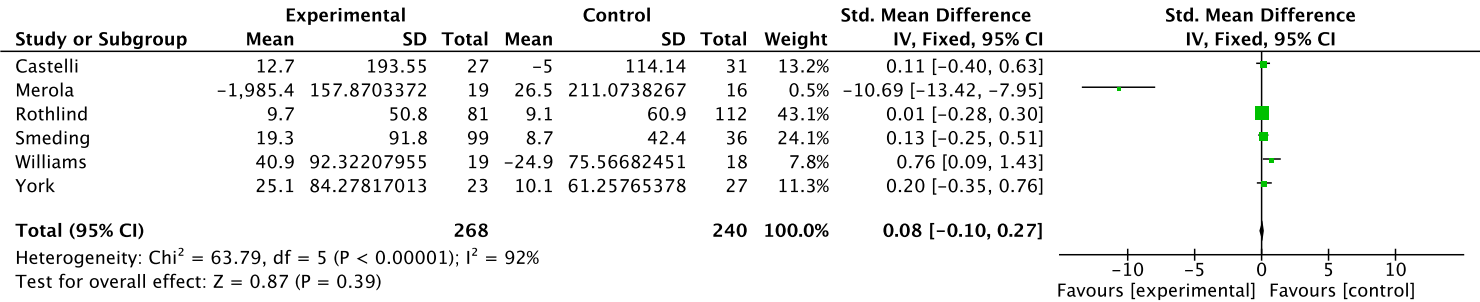

Figure S26. Forest plot of Trial Making b change STN DBS vs. Control

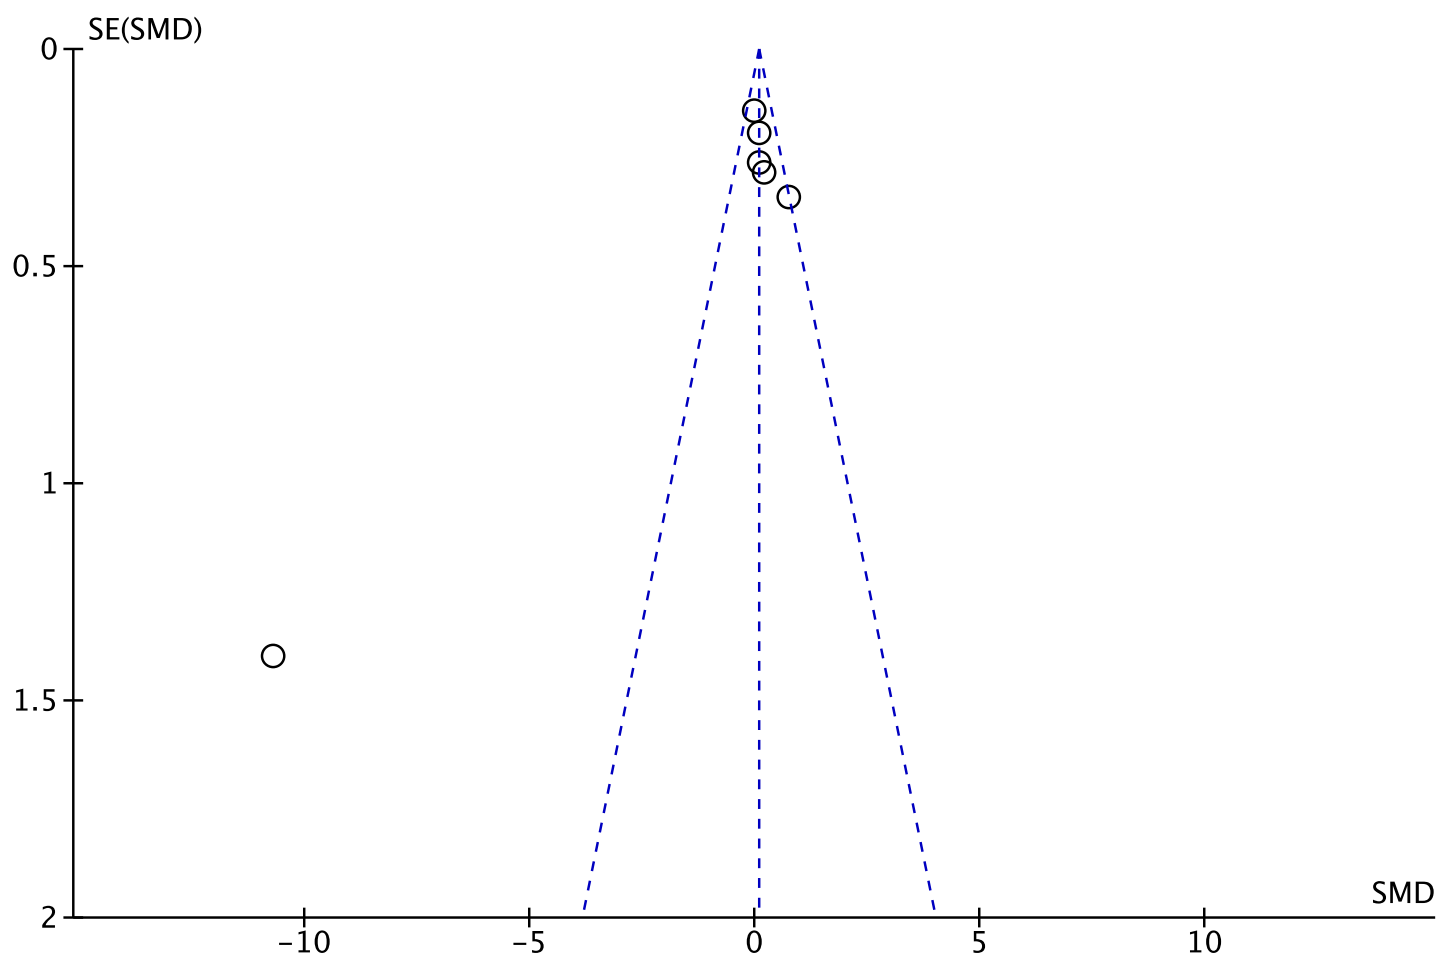

Figure S27. Funnel plot of Trial Making b change STN DBS vs. Control

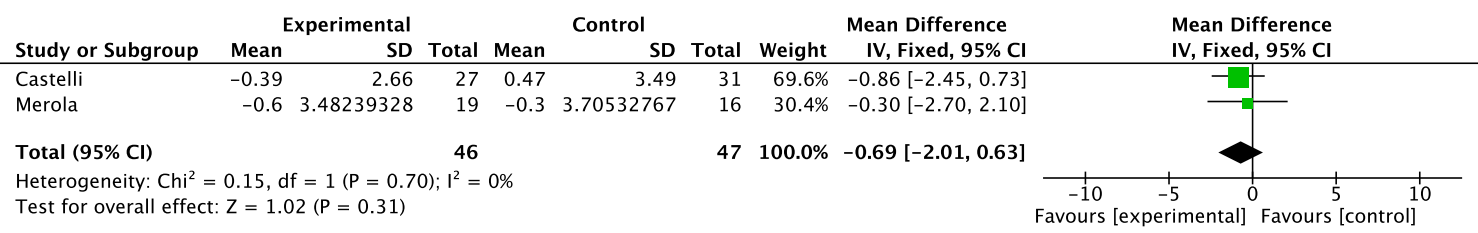

Figure S28. Forest plot of Paired associate learning change STN DBS vs. Control

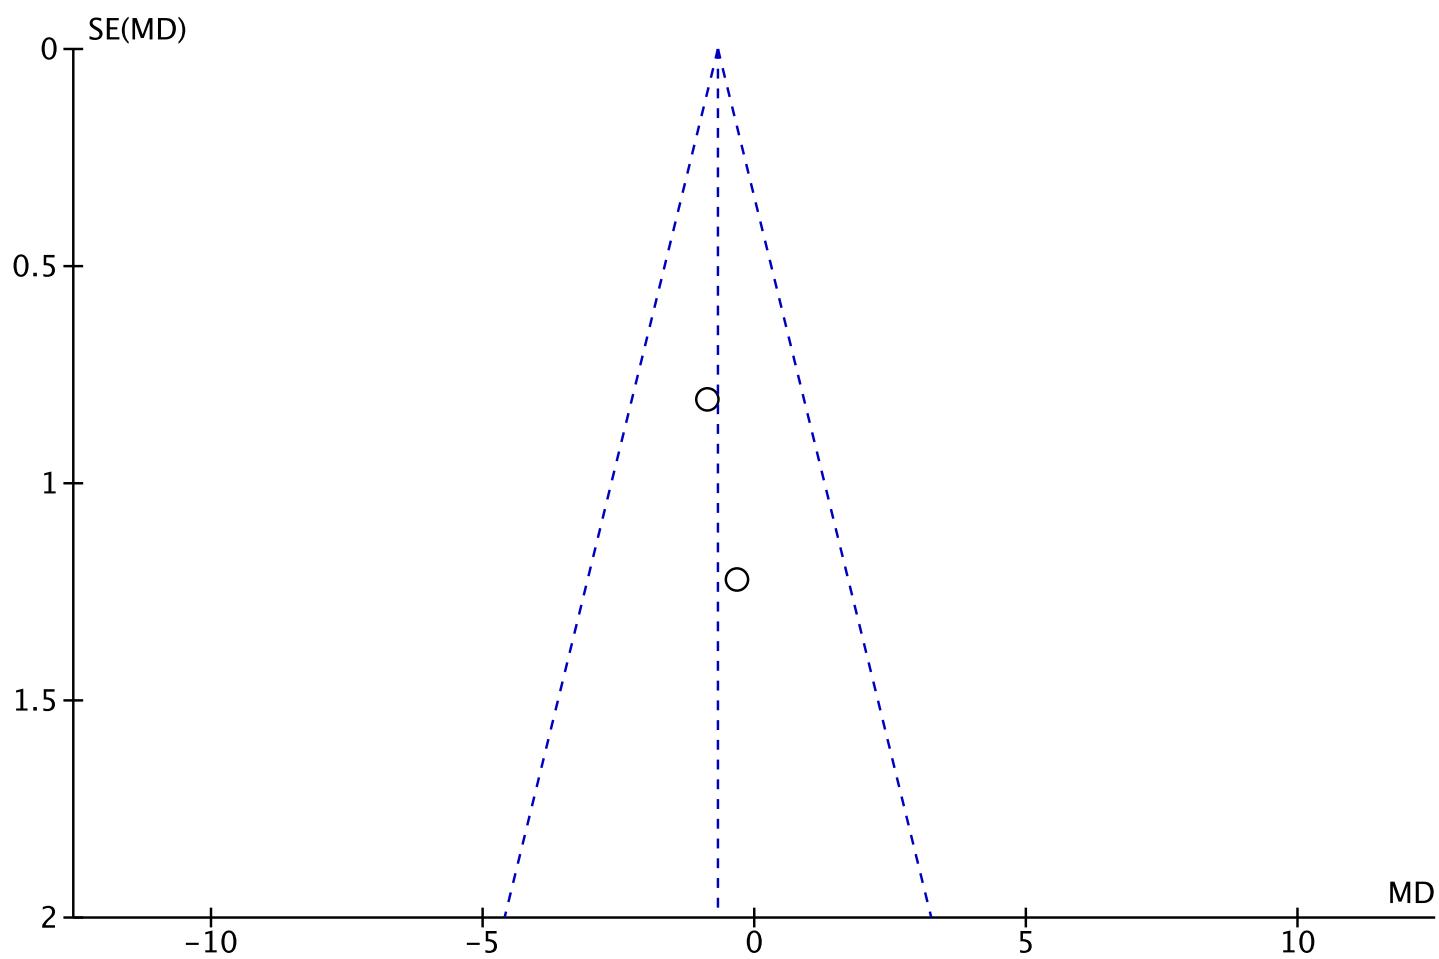

Figure S29. Funnel plot of Paired associate learning change STN DBS vs. Control

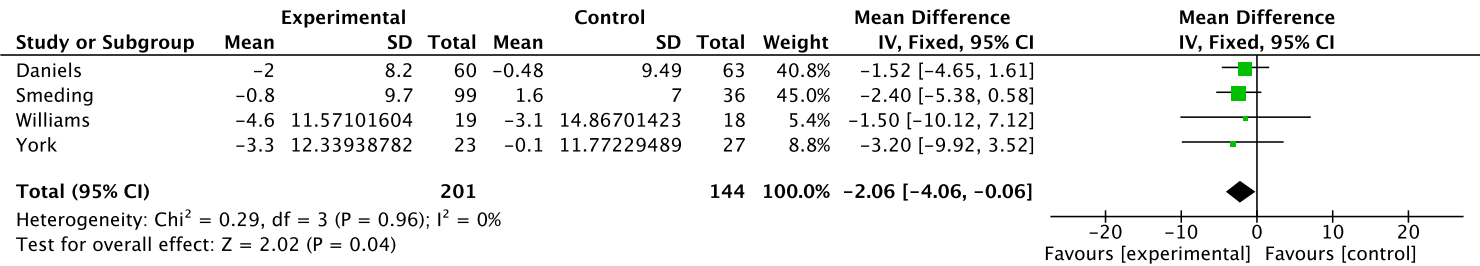

Figure S30. Forest plot of RAVLT-total change STN DBS vs. Control

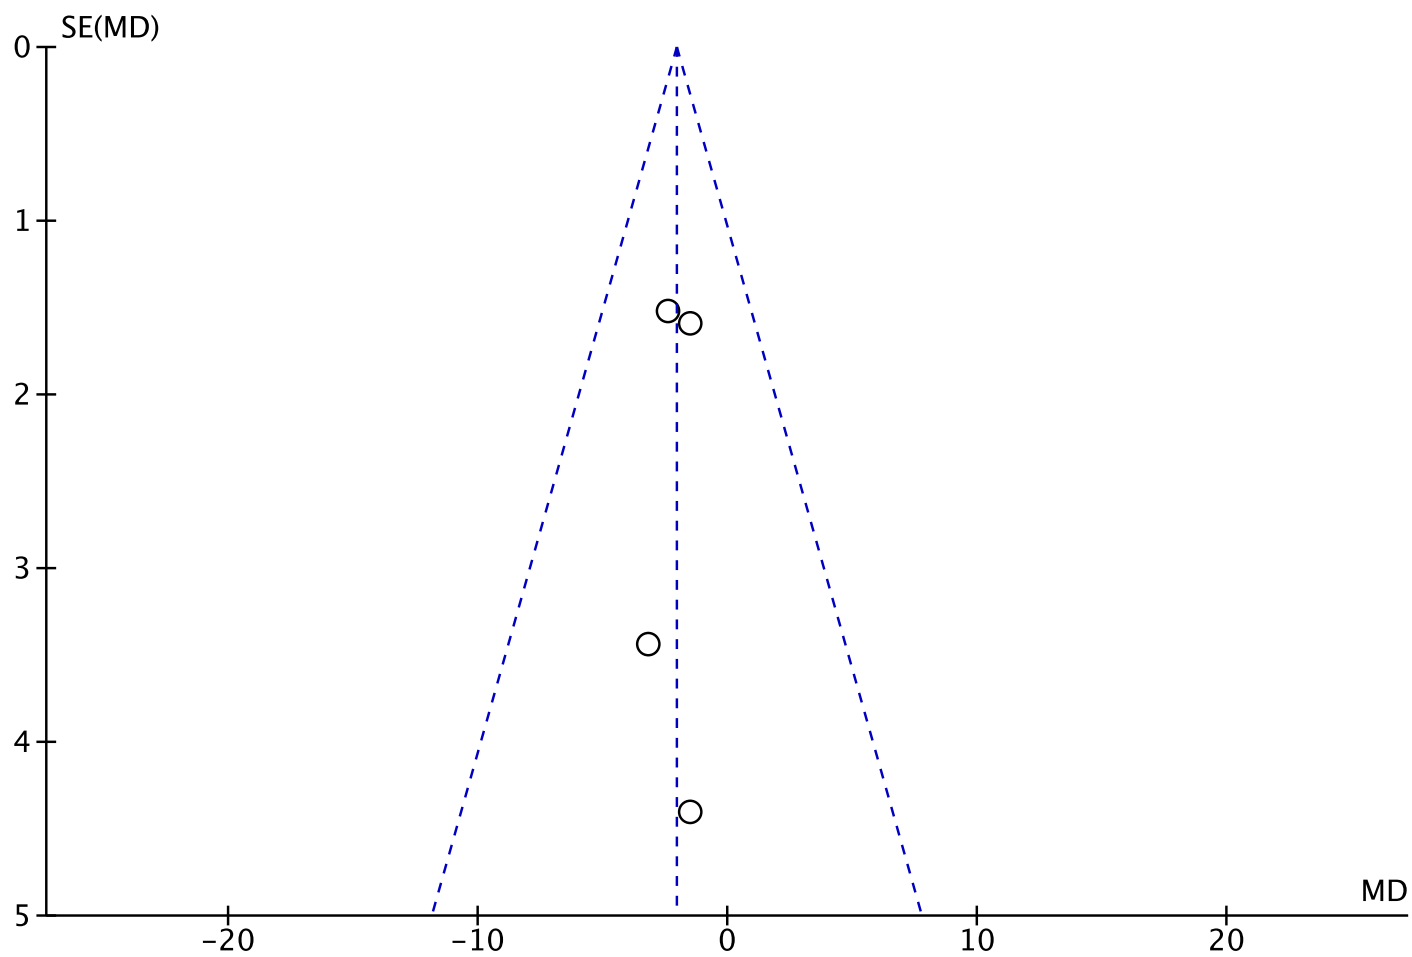

Figure S31. Funnel plot of RAVLT-total change STN DBS vs. Control

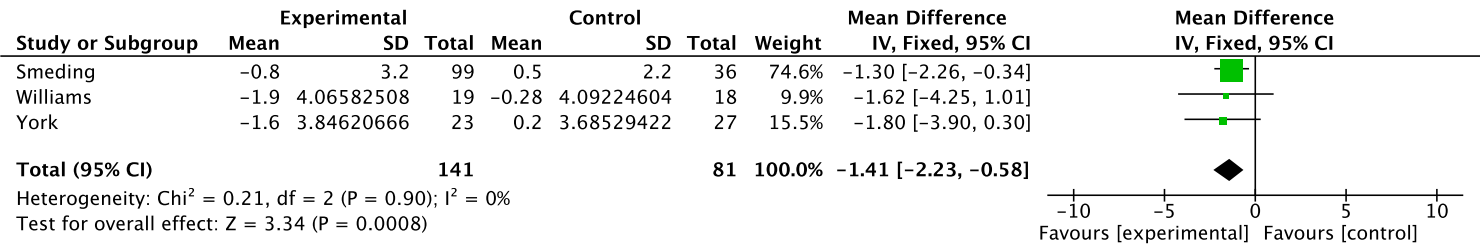

Figure S32. Forest plot of RAVLT-delayed recall change STN DBS vs. Control



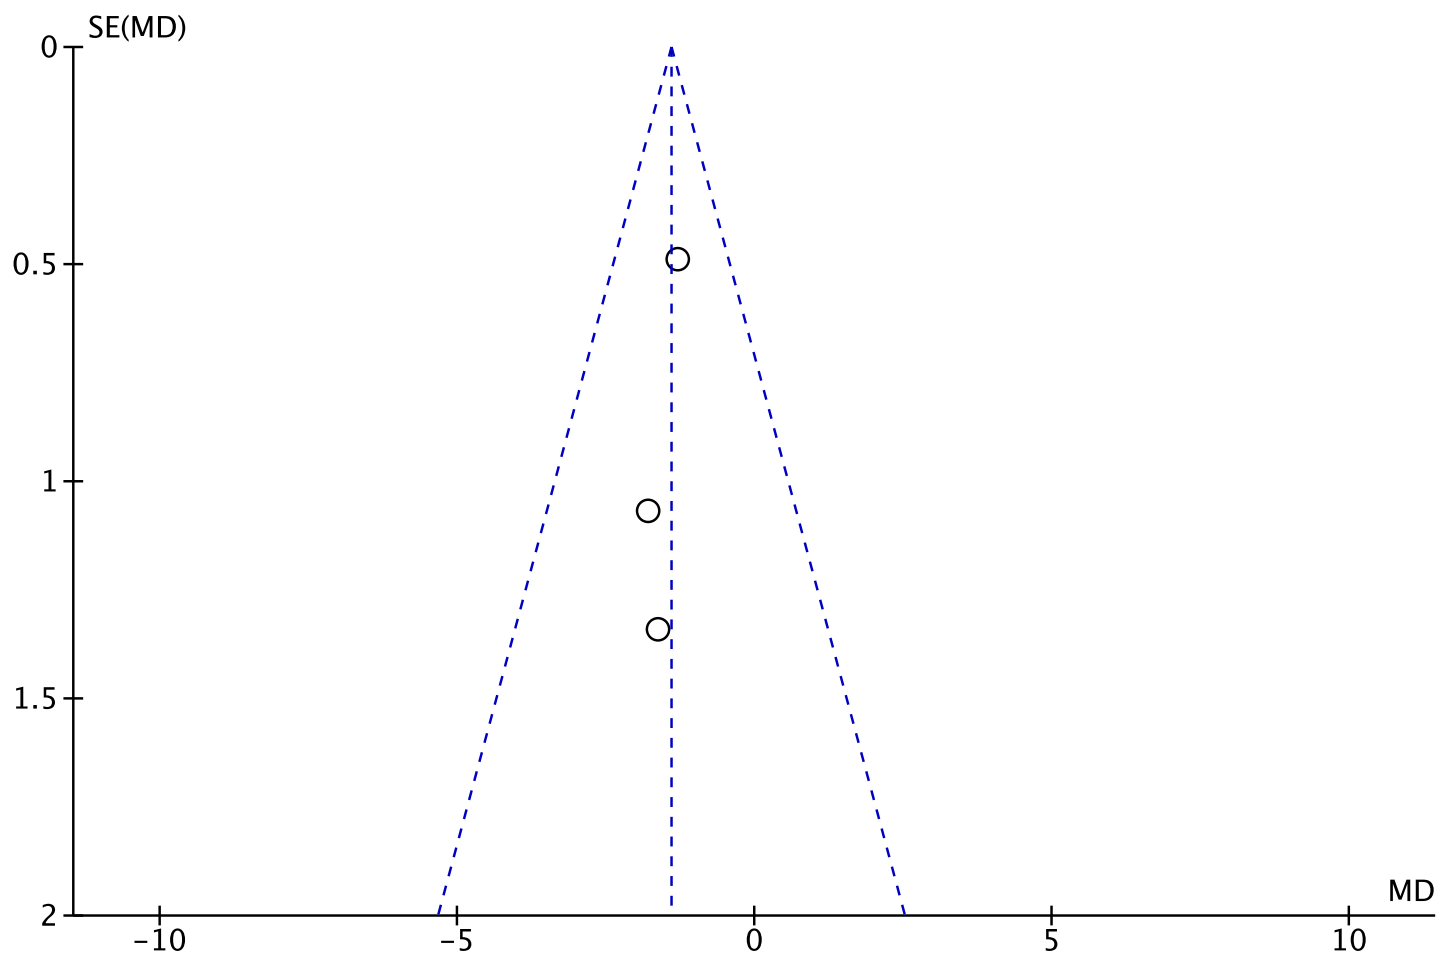

Figure S33. Funnel plot of RAVLT-delayed recall change STN DBS vs. Control
